# Supplementary material for: Bacterial, Archaea, and Viral Transcripts (BAVT) Expression in Gynecological Cancers and Correlation with Regulatory Regions of the Genome
Source: PubMed Central journal article supplement (PMC7961894; doi:10.3390/cancers13051109), 2021-03-05
Supplement: cancers-13-01109-s001.pdf [file cancers-13-01109-s001.pdf]

Supplementary Materials

# Bacterial, Archaea, and Viral Transcripts (BAVT) Expression in Gynecological Cancers and Correlation with Regulatory Regions of the Genome

Jesus Gonzalez-Bosquet, Silvana Pedra-Nobre, Eric J. Devor, Kristina W. Thiel, Michael J. Goodheart, David P. Bender and Kimberly K. Leslie

|           | Name      | Number of raw reads | Classified reads | Chordate reads | Microbial reads | Archaea reads | Viral reads |
|-----------|-----------|---------------------|------------------|----------------|-----------------|---------------|-------------|
| <b>A.</b> | Tube1     | 47,405,479          | 100%             | 92.4%          | 0.871%          | 0.0281%       | 0.828%      |
|           | Tube11    | 31,648,107          | 100%             | 94.1%          | 0.722%          | 0.0469%       | 0.662%      |
|           | Tube13    | 28,679,244          | 100%             | 94.8%          | 1.38%           | 0.069%        | 1.29%       |
|           | Tube15    | 22,557,926          | 100%             | 94.1%          | 0.895%          | 0.0558%       | 0.823%      |
|           | Tube17    | 24,350,478          | 100%             | 90.7%          | 1.82%           | 0.0366%       | 1.77%       |
|           | Tube18    | 36,677,140          | 100%             | 95.3%          | 0.752%          | 0.0452%       | 0.693%      |
|           | Tube2     | 31,836,254          | 100%             | 93.3%          | 1.85%           | 0.0308%       | 1.8%        |
|           | Tube3     | 24,368,492          | 100%             | 95.9%          | 0.749%          | 0.104%        | 0.631%      |
|           | Tube4     | 30,703,146          | 100%             | 94.9%          | 1.65%           | 0.0395%       | 1.59%       |
|           | Tube6     | 30,955,743          | 100%             | 93.3%          | 2.18%           | 0.0383%       | 2.13%       |
|           | Tube8     | 26,835,434          | 100%             | 92.9%          | 1.97%           | 0.0622%       | 1.9%        |
|           | Tube9     | 28,999,794          | 100%             | 92.1%          | 1.78%           | 0.0515%       | 1.72%       |
|           | <b>B.</b> | Patient1            | 29,785,008       | 100%           | 93.9%           | 0.447%        | 0.0357%     |
| Patient10 |           | 36,469,173          | 100%             | 94.7%          | 0.647%          | 0.0286%       | 0.601%      |
| Patient11 |           | 29,298,620          | 100%             | 95.4%          | 1.38%           | 0.051%        | 1.32%       |
| Patient12 |           | 34,125,387          | 100%             | 95%            | 1.31%           | 0.0438%       | 1.25%       |
| Patient13 |           | 25,969,661          | 100%             | 91.7%          | 2.49%           | 0.0315%       | 2.45%       |
| Patient14 |           | 31,629,474          | 100%             | 91.4%          | 0.811%          | 0.0366%       | 0.762%      |
| Patient15 |           | 22,319,317          | 100%             | 92.7%          | 1.84%           | 0.0721%       | 1.76%       |
| Patient16 |           | 32,901,087          | 100%             | 95%            | 0.367%          | 0.0472%       | 0.308%      |
| Patient17 |           | 32,134,740          | 100%             | 96.1%          | 0.458%          | 0.0499%       | 0.396%      |
| Patient18 |           | 30,914,680          | 100%             | 92.3%          | 2.11%           | 0.0779%       | 2.01%       |
| Patient19 |           | 23,671,248          | 100%             | 89.9%          | 2.83%           | 1.44%         | 1.31%       |
| Patient2  |           | 29,830,848          | 100%             | 94.9%          | 1.04%           | 0.027%        | 0.993%      |
| Patient20 |           | 43,015,725          | 100%             | 94.2%          | 1.94%           | 0.0583%       | 1.87%       |
| Patient21 |           | 39,939,950          | 100%             | 92.2%          | 1.14%           | 0.0682%       | 1.06%       |
| Patient22 |           | 28,661,428          | 100%             | 89%            | 2.34%           | 0.0594%       | 2.24%       |

**Figure S1.** Transcript expression of bacterial, viral and archaea organisms between normal tube tissue and ovarian cancer: (A). Number of aligned transcripts in normal tube and percentage of human (chordate) and non-human, including bacterial (or microbial), viral and archaea, among the total aligned RNA. (B). Number of aligned transcripts in 15 of the HGSC samples and percentage of human (chordate) and non-human, including bacterial (or microbial), viral and archaea, among the total aligned RNA.

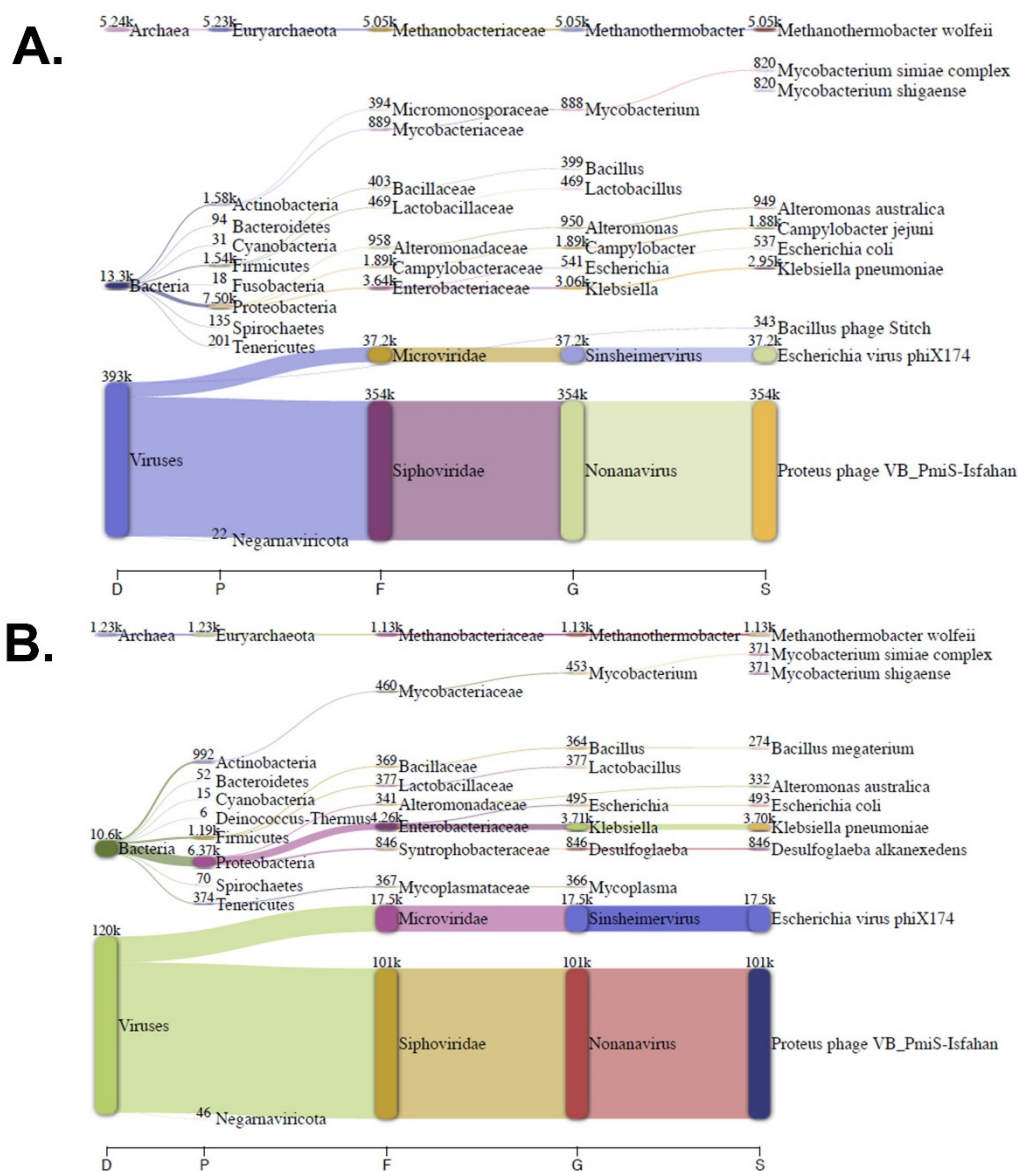

**Figure S2.** Sankey diagram visualization of the flow of values of human, bacterial, viral and archaea transcripts: the width of the diagram measures the size of transcripts. The differential expression analysis was performed at the Species Taxonomy rank; Taxonomy ranks: D: Domain; P: Phyla; F: Family; G: Genus; S: Species. (A). Normal tube sample. (B). HGSC sample.

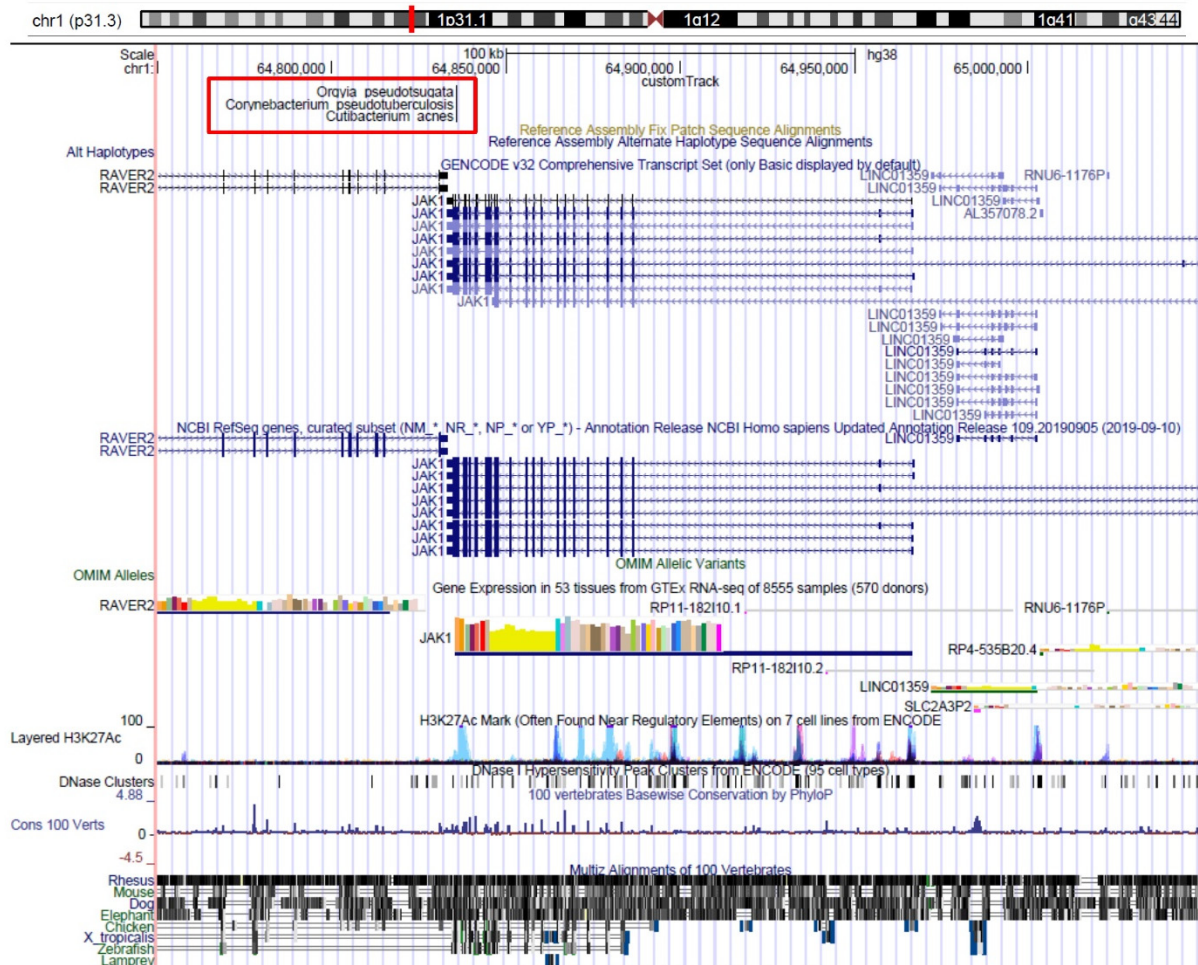

**Figure S3.** Sequence of methods with *Cutibacterium Acnes* (nucleotide NZ\_AP019664.1) as an example. Best concordant aligned pairs were mapped with UCSC Genome Browser into the human genome (hg38): at the chromosomal marker (upper part of the panel, red rectangle) transcripts from *Orgyia pseudotsugata*, *Corynebacterium pseudotuberculosis* and *Cutibacterium acnes* were mapped at the 3' region of the *JAK1* gene (Janus kinase 1).

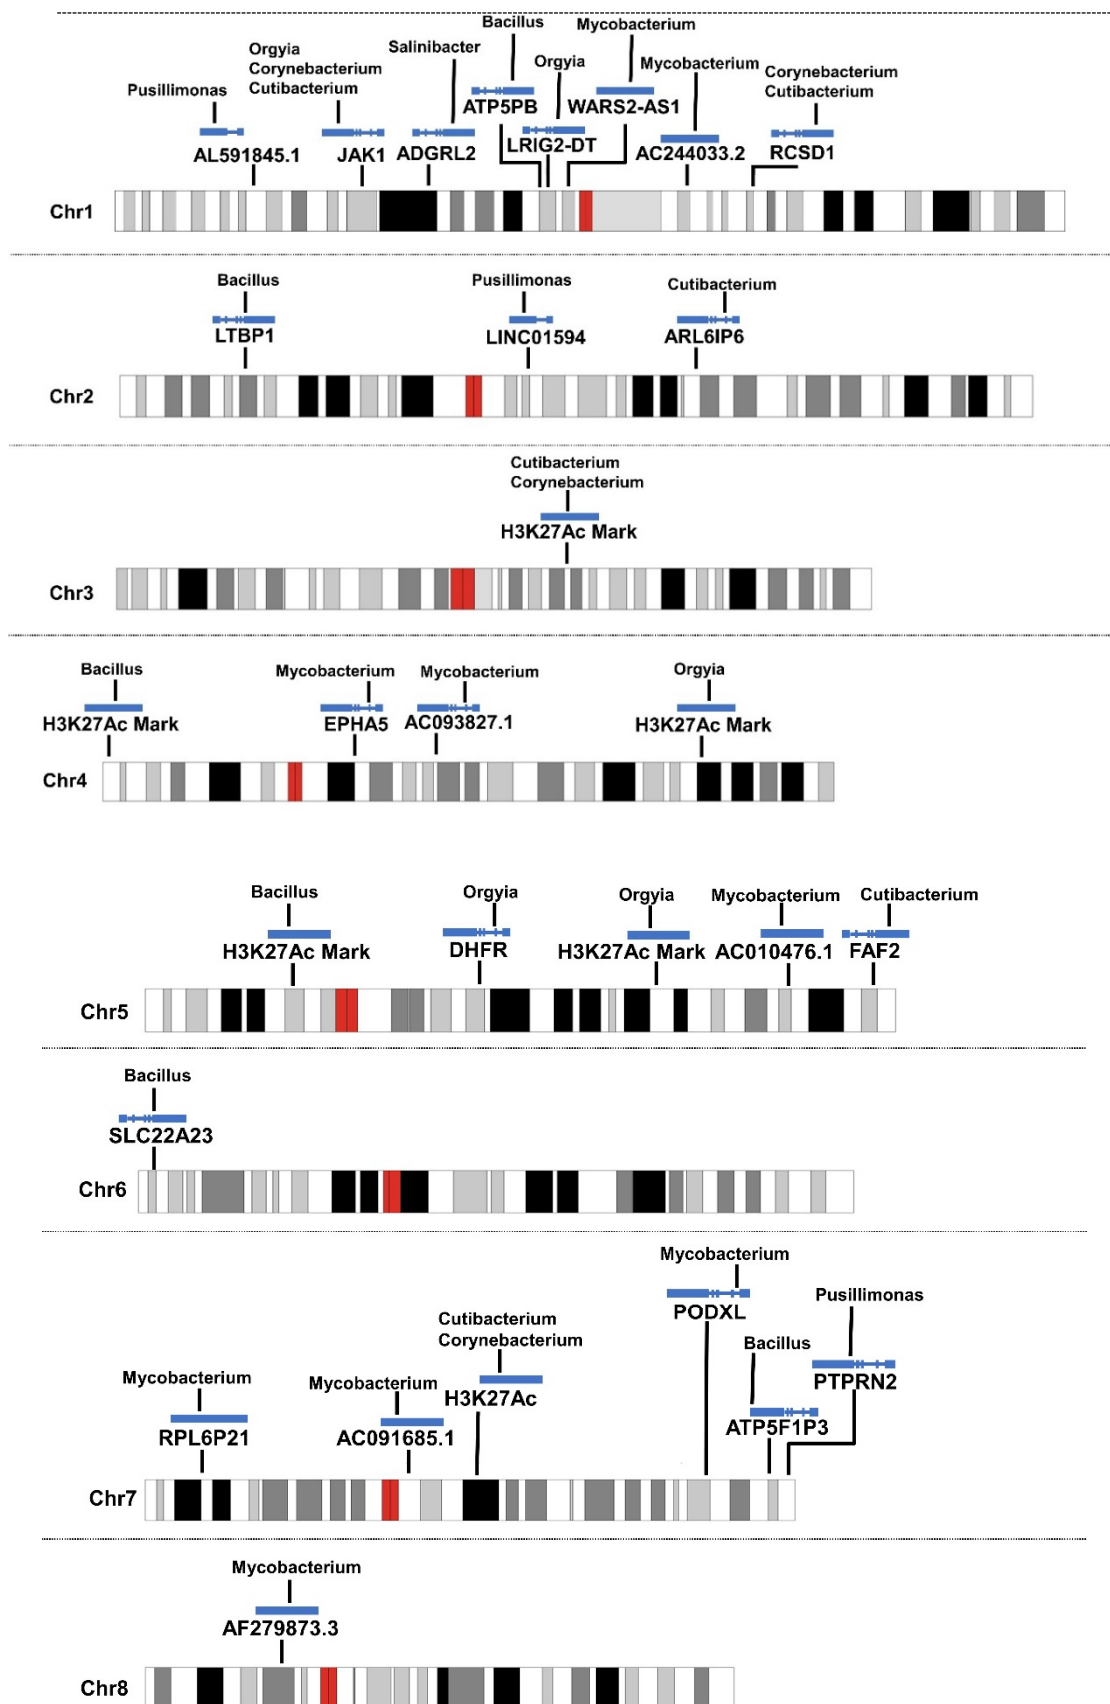

Figure S4. Cont.

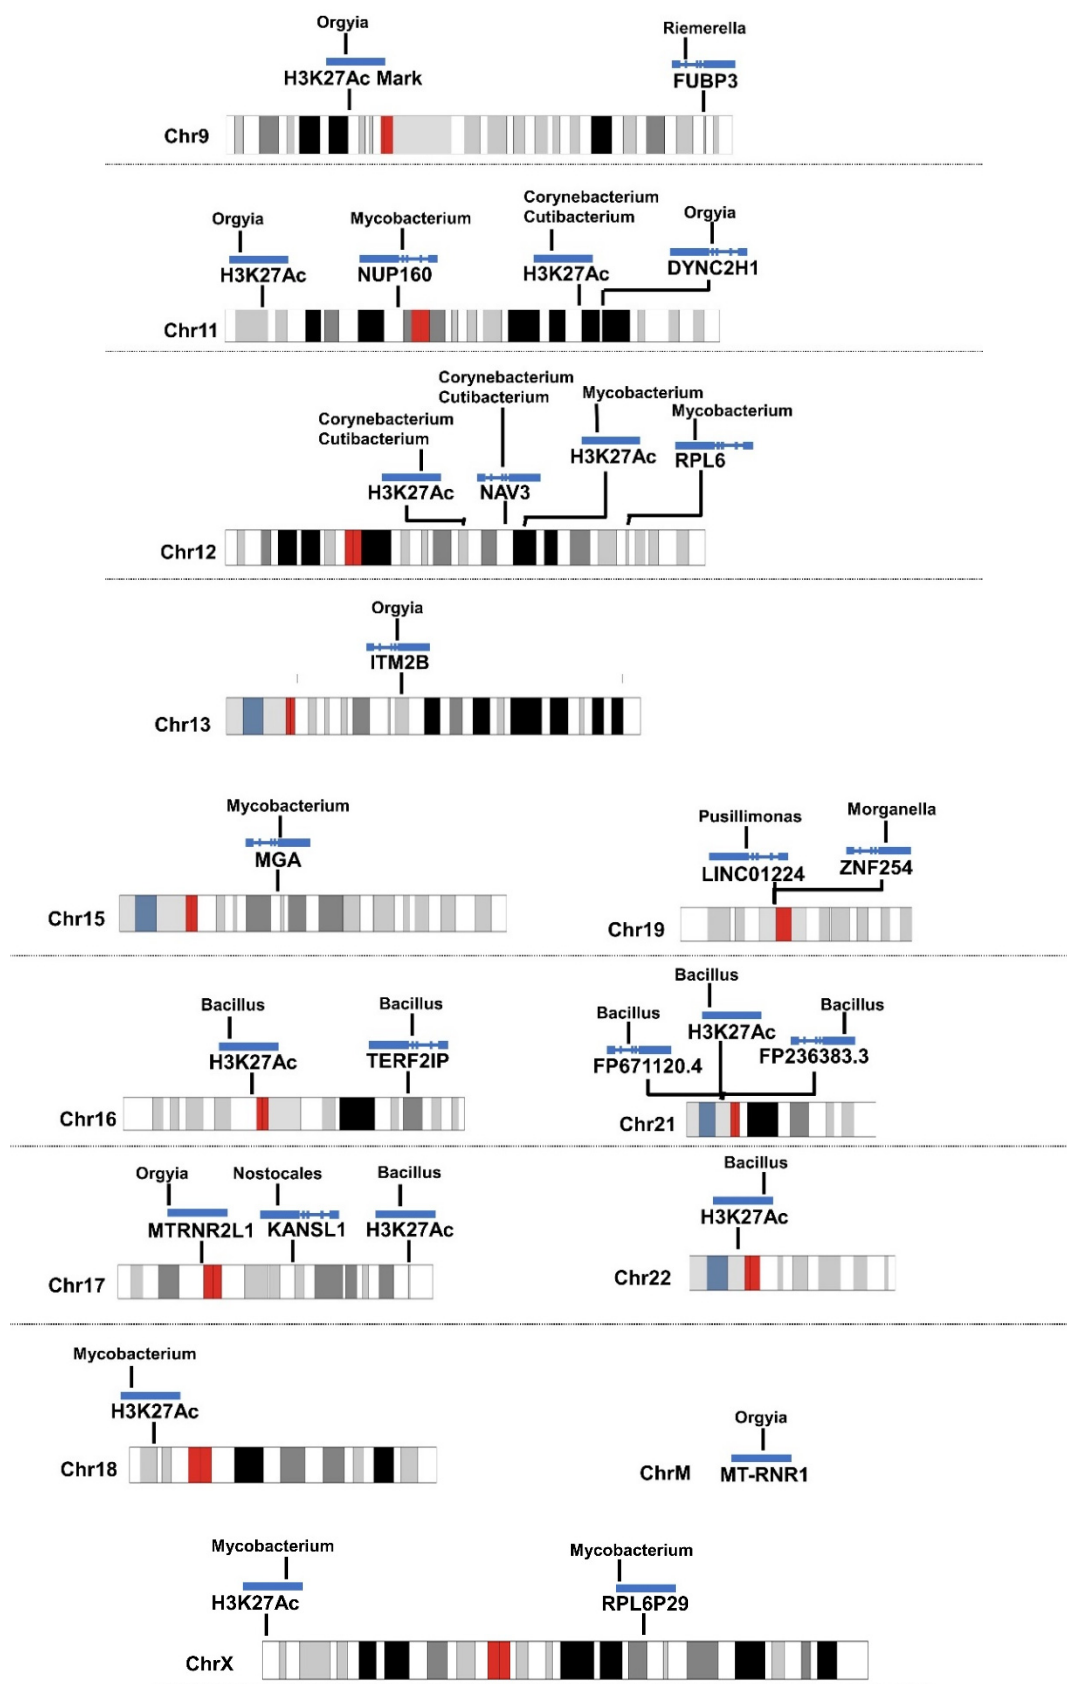

**Figure S4.** Detailed mapping of significant BAVT integrated into the human genome. Locations are provided in the 23-human karyotype view of the hg38 human genome assembly.

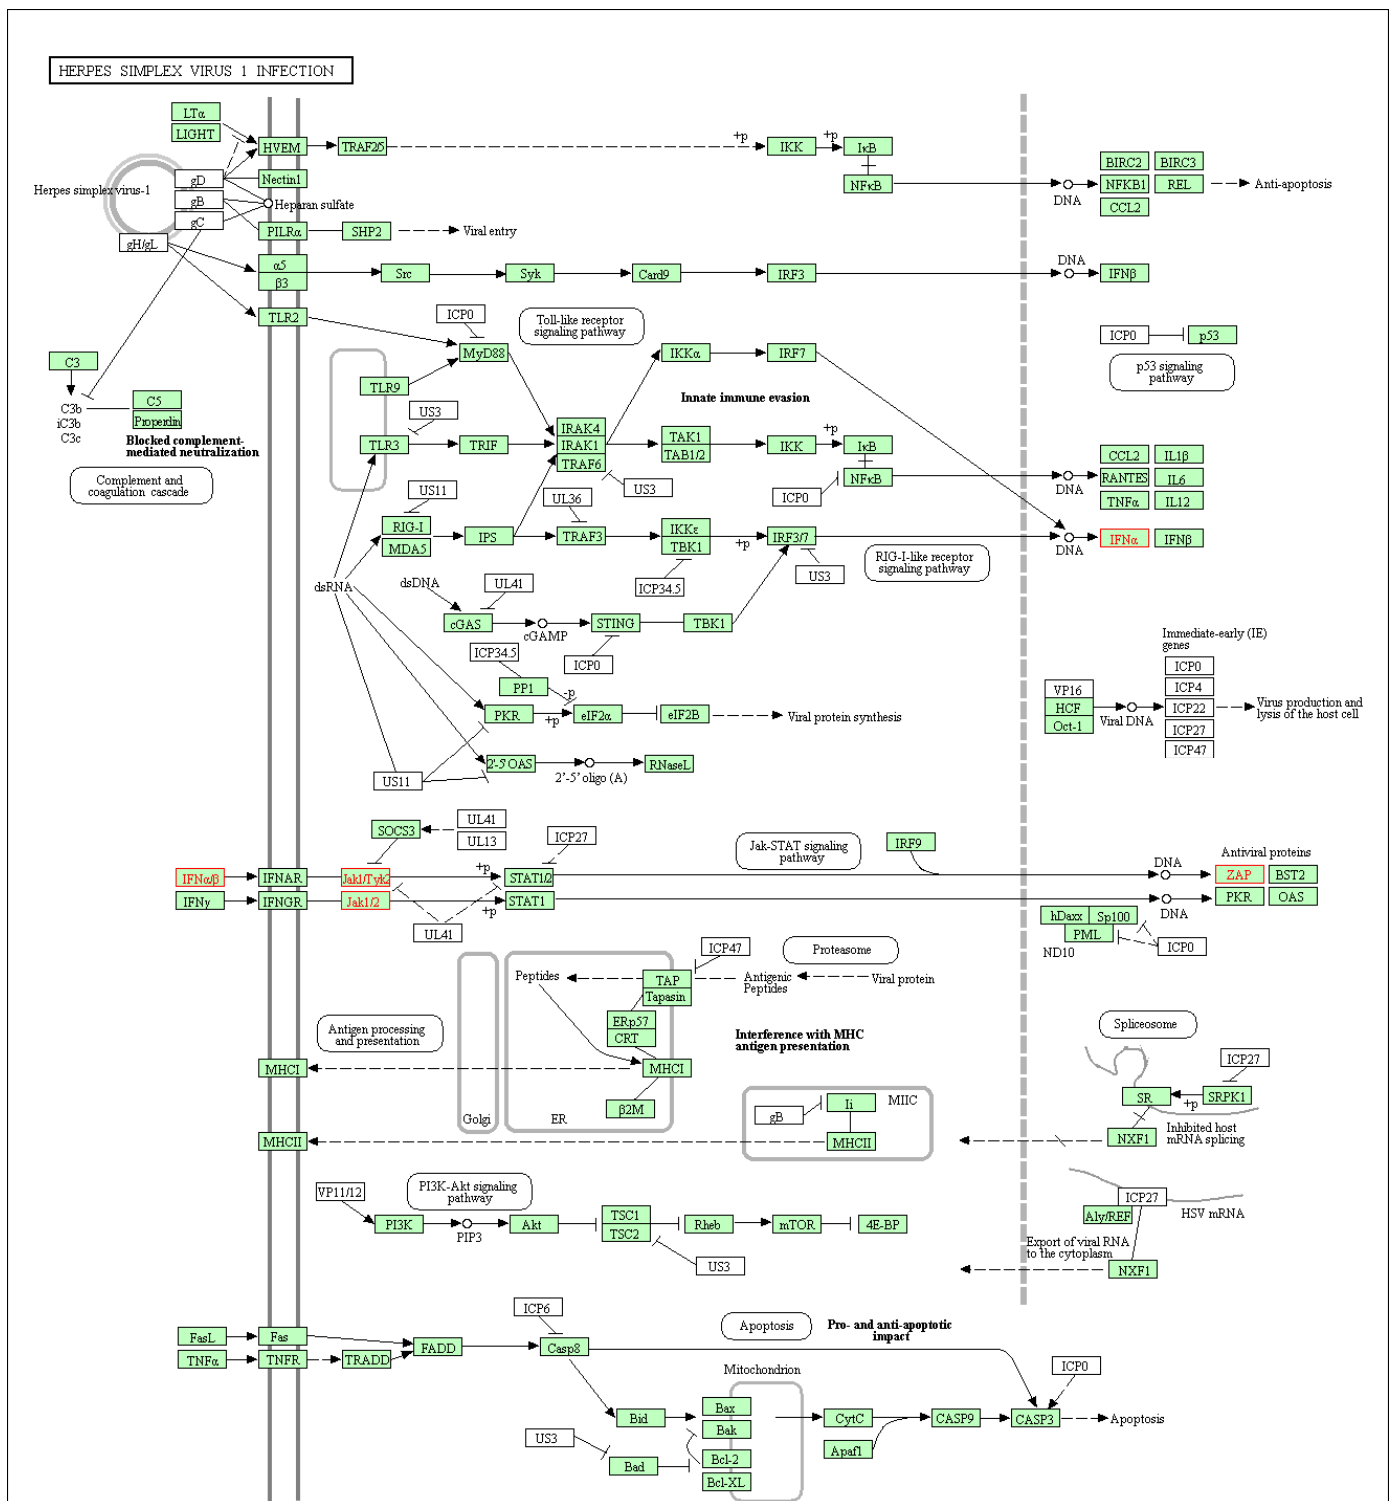

**Figure S5.** Herpes simplex virus 1 infection pathway (KEGG ID hsa05168). Highlighted in red genes introduced in the enrichment pathway analysis.

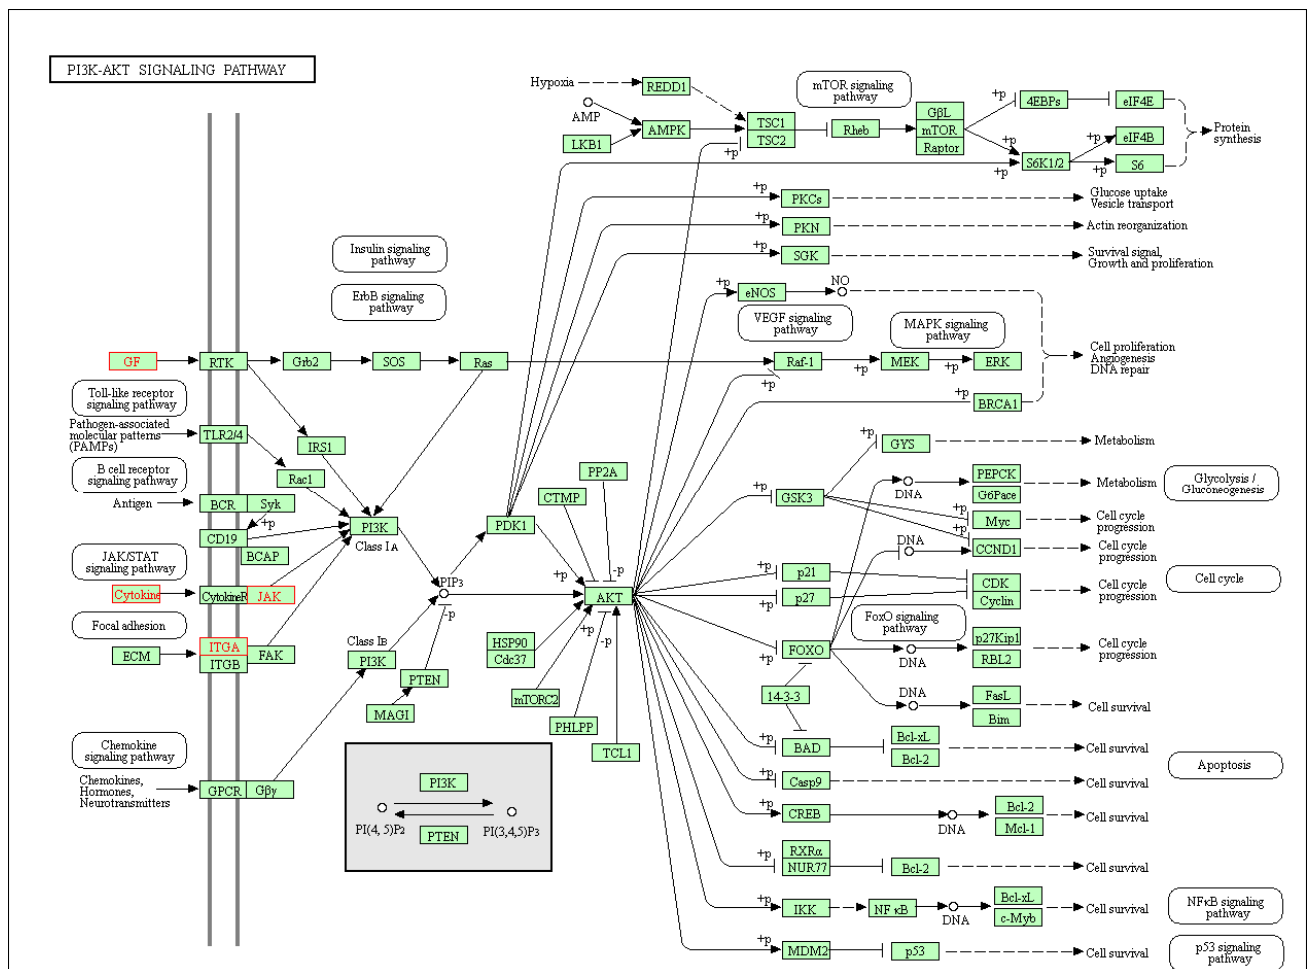

Figure S6. PI3K-Akt signaling pathway (KEGG ID hsa04151). Highlighted in red genes introduced in the enrichment pathway analysis.

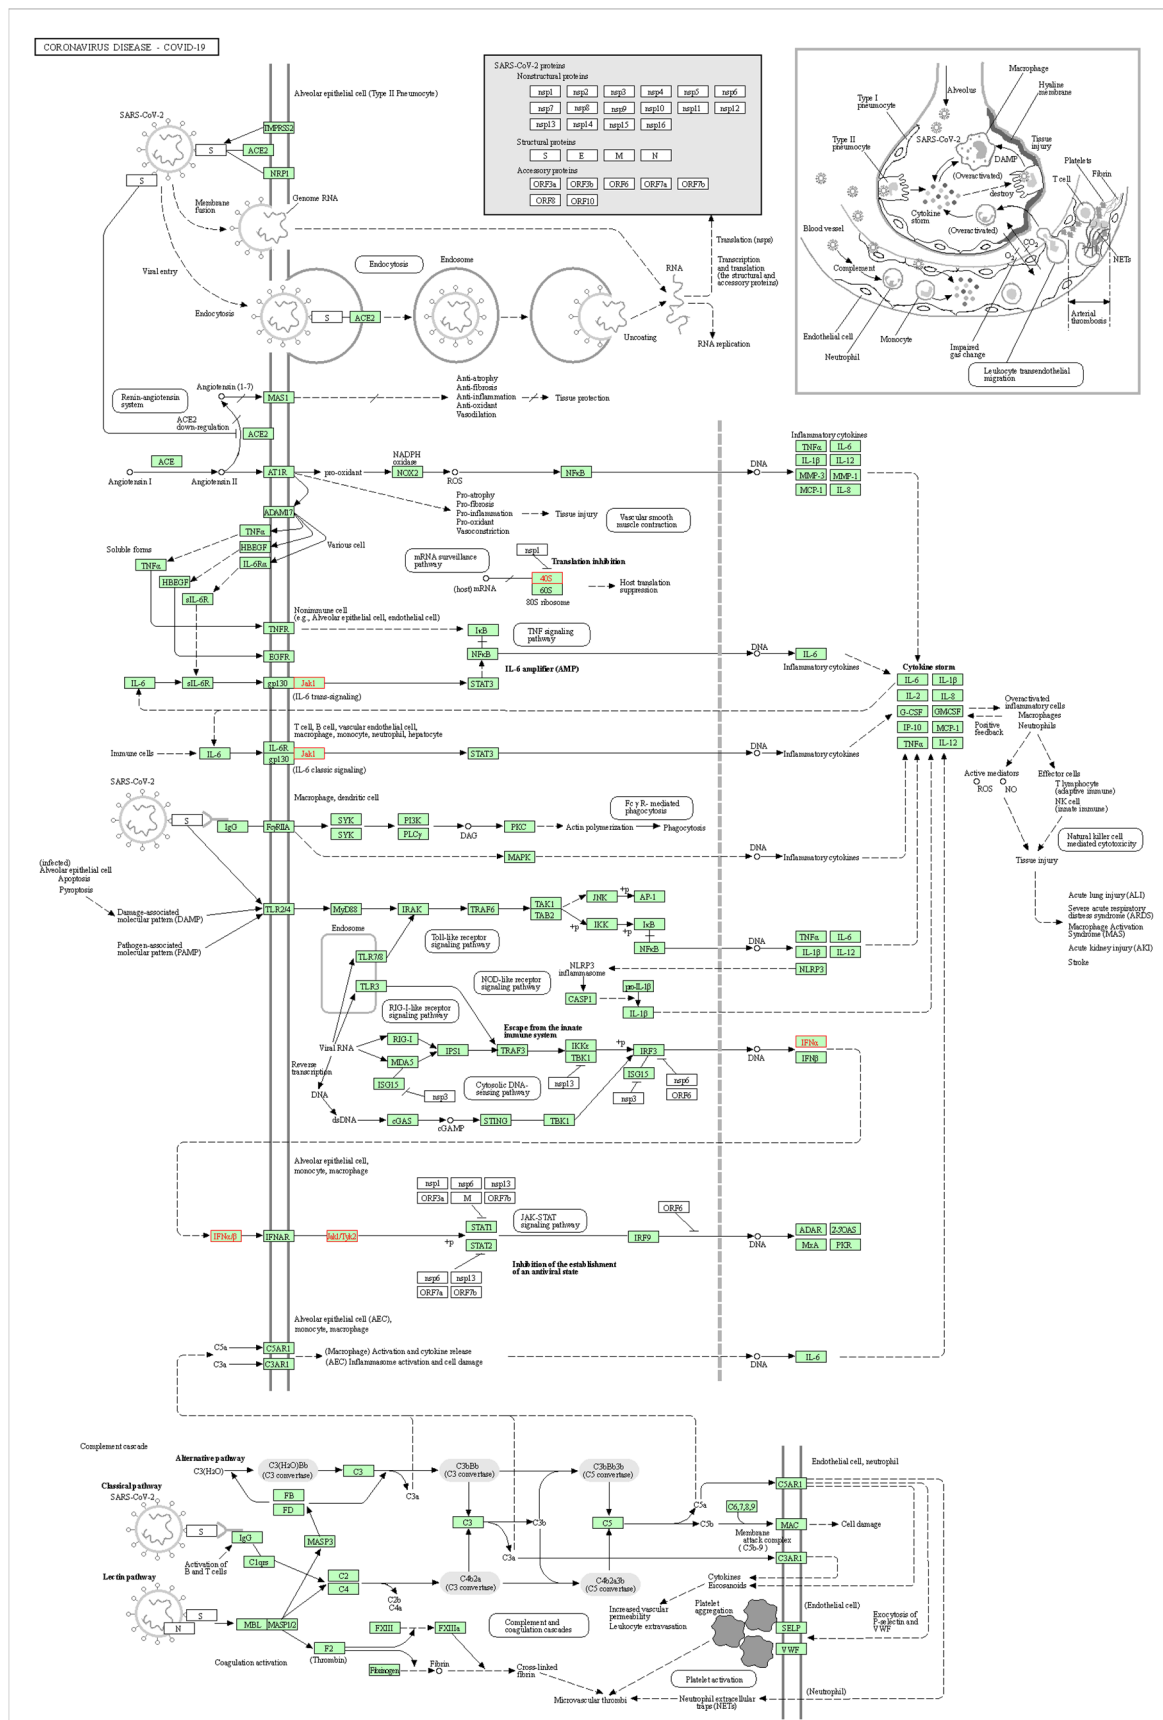

Figure S7. Coronavirus disease - COVID-19 pathway (KEGG ID hsa05171). Highlighted in red genes introduced in the enrichment pathway analysis.



**Table S1.** Methodological process using *Cutibacterium Acnes* (nucleotide NZ\_AP019664.1) as an example. Best concordant aligned pairs were mapped with UCSC Genome Browser into the human genome (hg38). Genes and transcripts included in the same UCSC visualizing window that the mapped sequences were considered to be in the vicinity (around 25 kb per side).

| Loci                     | Name                                      | Transcripts Included | Name                                                        | Loci                     | Close Transcripts | Loci                     |
|--------------------------|-------------------------------------------|----------------------|-------------------------------------------------------------|--------------------------|-------------------|--------------------------|
| chr1:36330639-36330670   | <i>Pusillimonas_sp</i>                    | AL591845.1           | LncRNA                                                      | chr1:36329630-36335406   |                   |                          |
| chr1:64835852-64835881   | <i>Orgyia_pseudotsugata</i>               |                      |                                                             |                          |                   |                          |
| chr1:64835852-64835881   | <i>Corynebacterium_pseudotuberculosis</i> | JAK1                 | Janus kinase 1                                              | chr1:64833229-64966549   |                   |                          |
| chr1:64835852-64835881   | <i>Cutibacterium_acnes</i>                |                      |                                                             |                          |                   |                          |
| chr1:81960259-81960362   | <i>Salinibacter_ruber</i>                 | ADGRL2               | Cell membrane; Multi-pass membrane protein                  | chr1:81836985-81991145   |                   |                          |
| chr1:111449478-111449581 | <i>Bacillus_licheniformis</i>             | ATP5PB               | ATP synthase peripheral stalk-membrane subunit b            | chr1:111449464-111462773 |                   |                          |
| chr1:111449832-111449874 | <i>Bacillus_licheniformis</i>             |                      |                                                             |                          |                   |                          |
| chr1:113067311-113067333 | <i>Orgyia_pseudotsugata</i>               | LRIG2-DT             | LRIG2 divergent transcript                                  | chr1:113011687-113073113 |                   |                          |
| chr1:119219359-119219508 | <i>Mycobacterium_shigaense</i>            | WARS2-AS1            | LncRNA                                                      | chr1:119140391-119238057 |                   |                          |
| chr1:150054451-150054520 | <i>Mycobacterium_shigaense</i>            | AC244033.2           | LncRNA                                                      | chr1:150045660-150067701 |                   |                          |
| chr1:167655490-167655514 | <i>Corynebacterium_pseudotuberculosis</i> | RCSD1                | RCSD domain containing 1                                    | chr1:167630093-167706248 |                   |                          |
| chr1:167655490-167655514 | <i>Cutibacterium_acnes</i>                |                      |                                                             |                          |                   |                          |
| chr2:33063225-33063244   | <i>Bacillus_megaterium</i>                | LTBP1                | latent transforming growth factor beta binding protein 1    | chr2:32946953-33399509   |                   |                          |
| chr2:108177575-108177603 | <i>Pusillimonas_sp</i>                    | LINC01594            | long intergenic non-protein coding RNA 1594                 | chr2:108167126-108217886 |                   |                          |
| chr2:152742628-152742665 | <i>Corynebacterium_pseudotuberculosis</i> | ARL6IP6              | ADP ribosylation factor like GTPase 6 interacting protein 6 | chr2:152718625-152759840 |                   |                          |
| chr2:152742628-152742665 | <i>Cutibacterium_acnes</i>                |                      |                                                             |                          |                   |                          |
| chr3:117799077-117799101 | <i>Corynebacterium_pseudotuberculosis</i> | H3K27Ac Mark         | Often Found Near Regulatory Elements                        | chr3:117798752-117799426 |                   |                          |
| chr3:117799077-117799101 | <i>Cutibacterium_acnes</i>                |                      |                                                             |                          | AC092691.3        | chr3:117790350-117794384 |
| chr4:1618805-1618833     | <i>Bacillus_tropicus</i>                  | H3K27Ac Mark         | Often Found Near Regulatory Elements                        | chr4:1618689-1618949     | FAM53A            | chr4:1641293-1668741     |
| chr4:65574052-65574201   | <i>Mycobacterium_shigaense</i>            | EPHA5                | EPH receptor A5                                             | chr4:65319563-65670343   |                   |                          |
| chr4:86870775-86870920   | <i>Mycobacterium_shigaense</i>            | AC093827.1           | ribosomal protein L6 (RPL6) pseudogene                      | chr4:86870629-86871066   |                   |                          |
| chr4:155465824-155465974 | <i>Orgyia_pseudotsugata</i>               | H3K27Ac Mark         | Often Found Near Regulatory Elements                        | chr4:155465673-155466125 |                   |                          |
| chr4:155465824-155465974 | <i>Orgyia_pseudotsugata</i>               |                      |                                                             |                          | AC097526.1        | chr4:155442650-155448610 |
| chr4:155465824-155465974 | <i>Orgyia_pseudotsugata</i>               |                      |                                                             |                          | MTCYBP17          | chr4:155451617-155452405 |
| chr5:35835162-35835186   | <i>Bacillus_tropicus</i>                  | H3K27Ac Mark         | Often Found Near Regulatory Elements                        | chr5:35835137-35835211   |                   |                          |
| chr5:35835162-35835186   | <i>Bacillus_tropicus</i>                  |                      |                                                             |                          | AC137810.1        | chr5:35678484-35827018   |
| chr5:35835162-35835186   | <i>Bacillus_tropicus</i>                  |                      |                                                             |                          | IL7R              | chr5:35856891-35879603   |
| chr5:80651405-80651556   | <i>Orgyia_pseudotsugata</i>               | DHFR                 | dihydrofolate reductase                                     | chr5:80626226-80654983   |                   |                          |
| chr5:80651480-80651556   | <i>Orgyia_pseudotsugata</i>               |                      |                                                             |                          |                   |                          |

|                           |                                    |              |                                                               |                           |                       |                          |
|---------------------------|------------------------------------|--------------|---------------------------------------------------------------|---------------------------|-----------------------|--------------------------|
| chr5:123761384-123761529  | Orgyia_pseudotsugata               | H3K27Ac Mark | Often Found Near Regulatory Elements                          | chr5:123761238-123761675  |                       |                          |
|                           |                                    |              |                                                               |                           | LINC01170             | chr5:124059794-124438520 |
|                           |                                    |              |                                                               |                           | CSNK1G3               | chr5:123545415-123615455 |
| chr5:155111327-155111439  | Mycobacterium_shigaense            | AC010476.1   | ribosomal protein L6 (RPL6) pseudogene                        | chr5:155111184-155112324  |                       |                          |
| chr5:176489965-176489987  | Corynebacterium_pseudotuberculosis | FAF2         | Fas associated factor family member 2                         | chr5:176448385-176510074  |                       |                          |
| chr5:176489965-176489987  | Cutibacterium_acnes                |              |                                                               |                           |                       |                          |
| chr6:3360536-3360555      | Bacillus_megaterium                | SLC22A23     | solute carrier family 22 member 23                            | chr6:3268962-3457022      |                       |                          |
| chr7:14070660-14070804    | Mycobacterium_shigaense            | RPL6P21      | ribosomal protein L6 pseudogene 21                            | chr7:14070535-14071380    |                       |                          |
| chr7:64141664-64141813    | Mycobacterium_shigaense            | AC091685.1   | LncRNA                                                        | chr7:64140495-64150058    |                       |                          |
| chr7:81790582-81790604    | Corynebacterium_pseudotuberculosis | H3K27Ac Mark | Often Found Near Regulatory Elements                          | chr7:81790490-81790696    |                       |                          |
| chr7:81790582-81790604    | Cutibacterium_acnes                |              |                                                               |                           | HGF                   | chr7:81699010-81770047   |
| chr7:137722577-137722726  | Mycobacterium_shigaense            | DGKI         | diacylglycerol kinase iota                                    | chr7:137381037-137846536  |                       |                          |
| chr7:152748905-152749052  | Bacillus_licheniformis             | H3K27Ac Mark | Often Found Near Regulatory Elements                          | chr7:152748313-152749644  |                       |                          |
|                           |                                    | ATP5F1P3     | ATP synthase peripheral stalk-membrane subunit b pseudogene 3 | chr7:152749079-152749735  |                       |                          |
| chr7:157813025-157813058  | Pusillimonas_sp                    | PTPRN2       | protein tyrosine phosphatase receptor type N2                 | chr7:157539056-158587773  |                       |                          |
| chr7:157813025-157813058  | Pusillimonas_sp                    |              |                                                               |                           |                       |                          |
| chr8:33859485-33859633    | Mycobacterium_shigaense            | AF279873.3   | LncRNA                                                        | chr8:33604856-34038485    |                       |                          |
| chr9:33657197-33657345    | Orgyia_pseudotsugata               | H3K27Ac Mark | Often Found Near Regulatory Elements                          | chr9:33656601-33657941    |                       |                          |
|                           |                                    |              |                                                               |                           | PTENP1 anti-sense RNA | chr9:33676785-33687990   |
| chr9:130582985-130583136  | Riemerella_anatipestifer           | FUBP3        | far upstream element binding protein 3                        | chr9:130579577-130638352  |                       |                          |
| chr11:10509546-10509697   | Orgyia_pseudotsugata               | H3K27Ac Mark | Often Found Near Regulatory Elements                          | chr11:10509394-10509849   |                       |                          |
| chr11:10509621-10509697   | Orgyia_pseudotsugata               |              |                                                               |                           | MTRNR2L8              | chr11:10507894-10509186  |
|                           |                                    |              |                                                               |                           | RNF141                | chr11:10511673-10541187  |
| chr11:47796168-47796251   | Mycobacterium_shigaense            | NUP160       | nucleoporin 160                                               | chr11:47778087-47848467   |                       |                          |
| chr11:97201026-97201048   | Corynebacterium_pseudotuberculosis | H3K27Ac Mark | Often Found Near Regulatory Elements                          | chr11:97200934-97201140   |                       |                          |
| chr11:97201026-97201048   | Cutibacterium_acnes                |              |                                                               |                           | LINC02553             | chr11:97222644-97259987  |
| chr11:103410399-103410548 | Orgyia_pseudotsugata               | DYNC2H1      | dynein cytoplasmic 2 heavy chain 1                            | chr11:103109426-103479863 |                       |                          |
| chr12:66105265-66105298   | Corynebacterium_pseudotuberculosis | H3K27Ac Mark | Often Found Near Regulatory Elements                          | chr12:66105129-66105434   |                       |                          |
| chr12:66105265-66105298   | Cutibacterium_acnes                |              |                                                               |                           | LLPH                  | chr12:66116555-66130750  |
| chr12:77998906-77998932   | Corynebacterium_pseudotuberculosis | NAV3         | neuron navigator 3                                            | chr12:77830894-78213010   |                       |                          |
| chr12:77998906-77998932   | Cutibacterium_acnes                |              |                                                               |                           |                       |                          |

|                                       |                           |              |                                       |                                       |            |                                       |
|---------------------------------------|---------------------------|--------------|---------------------------------------|---------------------------------------|------------|---------------------------------------|
| chr12:83151917-83152057               | Mycobacterium_shigaense   | H3K27Ac Mark | Often Found Near Regulatory Elements  | chr12:83151353-83152621               |            |                                       |
|                                       |                           |              |                                       |                                       | RPL6P25    | chr12:83151331-83152190               |
|                                       |                           |              |                                       |                                       | TMTC2      | chr12:82686906-83134866               |
|                                       |                           |              |                                       |                                       | AC090680.1 | chr12:83171590-83172740               |
| chr12:112405350-112405975             | Mycobacterium_shigaense   |              |                                       |                                       |            |                                       |
| chr12:112405350-112405378             | Mycobacterium_shigaense   | RPL6         | ribosomal protein L6                  | chr12:112405199-112409641             |            |                                       |
| chr12:112405852-112405977             | Mycobacterium_shigaense   |              |                                       |                                       |            |                                       |
| chr13:48240848-48240977               | Orgyia_pseudotsugata      | ITM2B        | integral membrane protein 2B          | chr13:48232612-48261875               |            |                                       |
| chr13:109424124-109424200             | Orgyia_pseudotsugata      | H3K27Ac Mark | Often Found Near Regulatory Elements  | chr13:109423817-109424509             |            |                                       |
|                                       |                           |              |                                       |                                       | AL163541.1 | chr13:109478739-109731700             |
|                                       |                           |              |                                       |                                       | LINC00399  | chr13:109400696-109401641             |
| chr15:41718496-41718642               | Mycobacterium_shigaense   | MGA          | MAX dimerization protein MGA          | chr15:41660412-41769943               |            |                                       |
| chr16:34160641-34160661               | Bacillus_megaterium       | H3K27Ac Mark | Often Found Near Regulatory Elements  | chr16:34160557-34160745               |            |                                       |
|                                       |                           |              |                                       |                                       | LINC00273  | chr16:34158585-34160036               |
| chr16:75709727-75709856               | Bacillus_licheniformis    | TERF2IP      | TERF2 interacting protein             | chr16:75647791-75761830               |            |                                       |
| chr17:22522619-22522767               | Orgyia_pseudotsugata      | MTRNR2L1     | MT-RNR2 like 1                        | chr17:22523111-22524663               |            |                                       |
| chr17:46034831-46034982               | Nostocales_cyanobacterium | KANSL1       | KAT8 regulatory NSL complex subunit 1 | chr17:46029916-46193198               |            |                                       |
| chr17:77234127-77234154               | Bacillus_tropicus         | H3K27Ac Mark | Often Found Near Regulatory Elements  | chr17:77234015-77234266               |            |                                       |
|                                       |                           |              |                                       |                                       | SEC14L1    | chr17:77140932-77214329               |
|                                       |                           |              |                                       |                                       | SEPTIN9-DT | chr17:77257737-77274326               |
| chr18:6462270-6462298                 | Mycobacterium_shigaense   | H3K27Ac Mark | Often Found Near Regulatory Elements  | chr18:6462154-6462414                 |            |                                       |
|                                       |                           |              |                                       |                                       | RNU6-349P  | chr18:6454962-6455068                 |
| chr19:23406864-23406886               | Pusillimonas_sp           | LINC01224    | LncRNA                                | chr19:23399470-23408091               |            |                                       |
| chr19:24103242-24103323               | Morganella_morganii       | ZNF254       | zinc finger protein 254               | chr19:24033405-24129961               |            |                                       |
| chr21:8210240-8210260                 | Bacillus_megaterium       | FP671120.4   | LncRNA                                | chr21:8197620-8227646                 |            |                                       |
| chr21:8254448-8254468                 | Bacillus_megaterium       | H3K27Ac Mark | Often Found Near Regulatory Elements  | chr21:8254364-8254552                 |            |                                       |
|                                       |                           |              |                                       |                                       | FP671120.7 | chr21:8254592-8255514                 |
| chr21:8393275-8393295                 | Bacillus_megaterium       | FP236383.3   | LncRNA                                | chr21:8380643-8410645                 |            |                                       |
| chr21:8437485-8437505                 | Bacillus_megaterium       | FP236383.3   | LncRNA                                | chr21:8380665-8454792                 |            |                                       |
| chr22_KI270733v1_random:126540-126560 | Bacillus_megaterium       | RNA45SN4     | RNA, 45S pre-ribosomal N4             | chr22_KI270733v1_random:126267-126833 |            |                                       |
| chr22_KI270733v1_random:171621-171641 | Bacillus_megaterium       | H3K27Ac Mark | Often Found Near Regulatory Elements  | chr22_KI270733v1_random:171537-171725 |            |                                       |
|                                       |                           |              |                                       |                                       | 5_8S_rRNA  | chr22_KI270733v1_random:173956-174108 |
|                                       |                           |              |                                       |                                       | AL353644.2 | chr22_KI270733v1_random:167218-167307 |

|                                |                         |              |                                           |                                |              |                               |
|--------------------------------|-------------------------|--------------|-------------------------------------------|--------------------------------|--------------|-------------------------------|
| chr22:11630156-11630176        | Bacillus_megaterium     | H3K27Ac Mark | Often Found Near Regulatory Elements      | chr22:11630072-11630260        |              |                               |
|                                |                         |              |                                           |                                | CT867976.1   | chr22:11474744-11479643       |
|                                |                         |              |                                           |                                | AC138776.1   | chr22:11827523-11910358       |
| chrM:1161-1237                 | Orgyia_pseudotsugata    | MT-RNR1      | mitochondrially encoded 12S ribosomal RNA | chrM:648-1601                  |              |                               |
| chrUn_GL000220v1:109687-109707 | Bacillus_megaterium     | LOC100507412 | uncharacterized LOC100507412              | chrUn_GL000220v1:97129-126696  |              |                               |
| chrUn_GL000220v1:153659-153679 | Bacillus_megaterium     | H3K27Ac Mark | Often Found Near Regulatory Elements      | chrUn_GL000220v1:153575-153763 |              |                               |
|                                |                         |              |                                           |                                | LOC100507412 | chrUn_GL000220v1:97129-126696 |
| chrX:1174838-1174984           | Mycobacterium_shigaense | H3K27Ac Mark | Often Found Near Regulatory Elements      | chrX:1174250-1175572           |              |                               |
|                                |                         |              |                                           |                                | CRLF2        | chrX:1187549-121263           |
| chrX:98252268-98252417         | Mycobacterium_shigaense | RPL6P29      | ribosomal protein L6 pseudogene 29        | chrX:98251679-98252543         |              |                               |
